# Supplementary material for: Aspirin: A Suicide Inhibitor of Carbonic Anhydrase II
Source: PubMed Central journal article supplement (PMC7226357; doi:10.3390/biom10040527), 2020-03-31
Supplement: biomolecules-10-00527-s001.pdf [file biomolecules-10-00527-s001.pdf]

## Supplementary

Table S1. X-Ray Statistics.

| Statistic                         | CA II Salicylic Acid       |
|-----------------------------------|----------------------------|
| Wavelength (Å)                    | 0.9795                     |
| Resolution range (Å)              | 35.55 - 1.36 (1.40 - 1.36) |
| Space group                       | P 1 21 1                   |
| Unit cell: a,b,c (Å)              | 41.3, 42.4, 72.0           |
| α, β, γ (°)                       | 90, 104.2, 90              |
| Total reflections                 | 145498 (7504)              |
| Unique reflections                | 48888 (3558)               |
| Multiplicity                      | 3.0 (2.1)                  |
| Completeness (%)                  | 93.72 (66.69)              |
| $I/I_{\sigma}$                    | 11.6 (0.8)                 |
| Wilson B-factor (Å <sup>2</sup> ) | 15.85                      |
| $R_{merge}^a$ (%)                 | 4.54 (77.60)               |
| $R_{work}^b$ (%)                  | 15.44 (32.61)              |
| $R_{free}^c$ (%)                  | 16.67 (33.08)              |
| $R_{pim}^d$ (%)                   | 2.97 (58.68)               |
| Reflections used in refinement    | 49449 (3514)               |
| Reflections used for R-free       | 2002 (138)                 |
| Number of non-hydrogen atoms      | 2359                       |
| macromolecules                    | 2128                       |
| ligands                           | 55                         |
| solvent                           | 176                        |
| Protein residues                  | 258                        |
| RMS(bonds) (Å)                    | 0.012                      |
| RMS(angles) (°)                   | 1.21                       |
| Ramachandran favored (%)          | 97.7                       |
| Ramachandran allowed (%)          | 2.3                        |
| Ramachandran outliers (%)         | 0.0                        |
| Rotamer outliers (%)              | 1.3                        |
| Average B-factor(Å <sup>2</sup> ) | 22.4                       |
| macromolecules                    | 21.5                       |
| ligands                           | 34.6                       |
| solvent                           | 30.7                       |

$$^a R_{merge} = (\sum |I - \langle I \rangle| / \sum \langle I \rangle) \times 100.$$

$$^b R_{work} = (\sum |F_o - F_c| / \sum |F_o|) \times 100.$$

<sup>c</sup> $R_{free}$  is calculated in the same way as  $R_{cryst}$  except it is for data omitted from refinement (5% of reflections for all data sets).

$$^d R_{pim} = [(\sum \sqrt{1/N} - 1) \sum |I - \langle I \rangle| / \sum \langle I \rangle] \times 100.$$

Values in parentheses correspond to those of the highest-resolution shell.
